# Supplementary material for: In Vivo and In Vitro Biological Evaluation and Molecular Docking Studies of Compounds Isolated from Micromeria biflora (Buch. Ham. ex D.Don) Benth
Source: MDPI journal article supplement (doi:10.3390/molecules27113377), 2022-05-24
Supplement: s1 [file s1]

# **In Vivo and In Vitro Biological Evaluation and Molecular Docking Studies of Compounds Isolated from *Micromeria biflora* (Buch. Ham. ex D.Don) Benth**

Abdullah S. M. Aljohani <sup>1,\*</sup>, Fahad A. Alhumaydhi <sup>2</sup>, Abdur Rauf <sup>3,\*</sup>, Essam M. Hamad <sup>4</sup> and Umer Rashid <sup>5</sup>

<sup>1</sup> Department of Veterinary Medicine, College of Agriculture and Veterinary Medicine, Qassim University, Buraydah 52571, Saudi Arabia

<sup>2</sup> Department of Medical Laboratories, College of Applied Medical Sciences, Qassim University, Buraydah 52571, Saudi Arabia; f.alhumaydhi@qu.edu.sa

<sup>3</sup> Department of Chemistry, University of Swabi, Anbar23561, Khyber Pakhtunkhwa, Pakistan

<sup>4</sup> Department of Food Science and Human Nutrition, College of Agriculture and Veterinary Medicine, Qassim University, Buraydah 52571, Saudi Arabia; e.hamad@qu.edu.sa

<sup>5</sup> Department of Chemistry, COMSATS University Islamabad, Abbottabad Campus, 22060, Pakistan; umerrashid@cuiatd.edu.pk

\* Correspondence: jhny@qu.edu.sa (A.S.M.A.); mashaljcs@yahoo.com (A.R.)

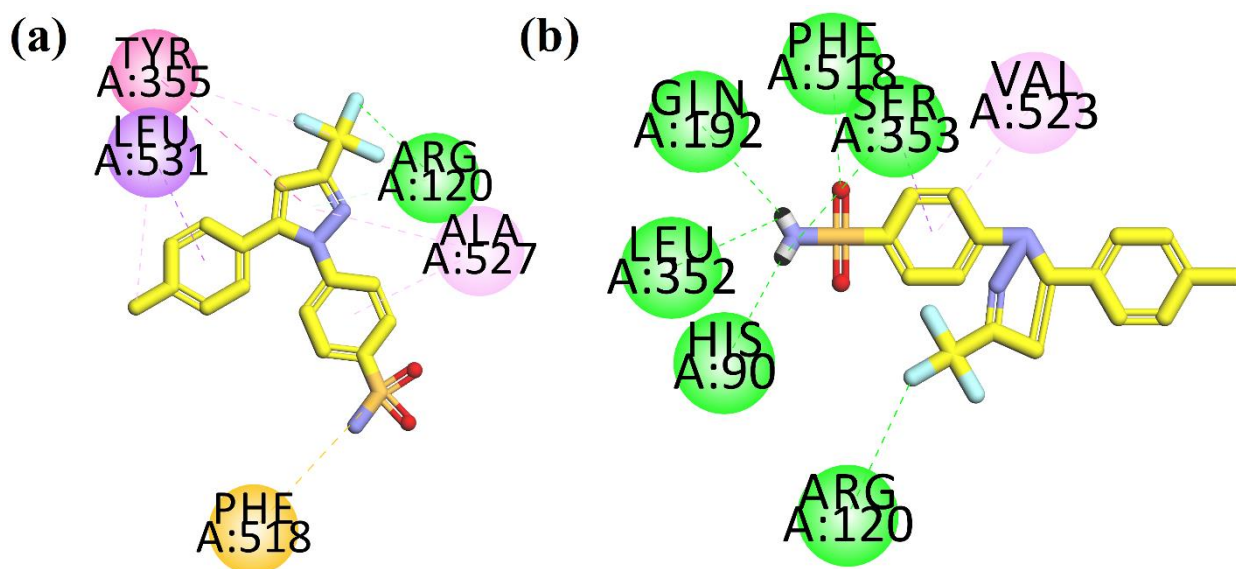

**Figure S1.** (a) The 2D interaction diagrams of isolated salicylalazine into the binding site of COX-1 (3N8Y) (b) COX-2 (1CX2).

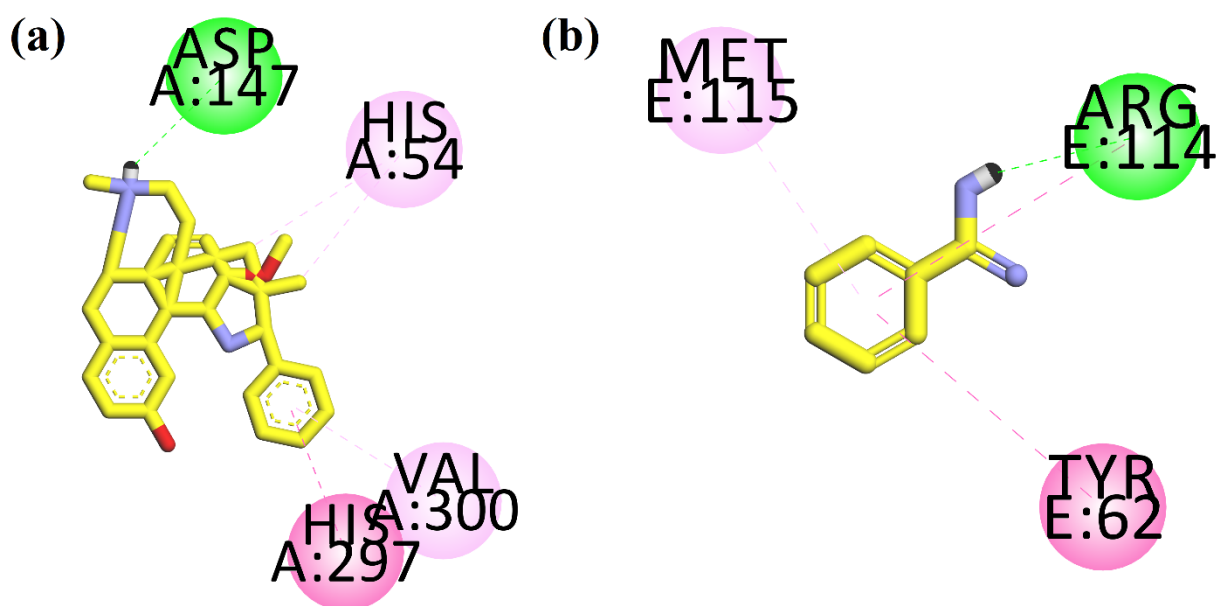

**Figure S2.** (a) The 2D interaction diagrams of isolated salicylalazine into the binding site of GABA (4COF) (b) μ-opioid (5C1M).
